# Supplementary material for: Necessity of Assessing Biological Exposure to Arsenic Species by Two Representative Analytical Methods
Source: MDPI journal article supplement (doi:10.3390/toxics9060138), 2021-06-11
Supplement: s1 [file s1]

## Article

# Supplementary Materials: Necessity of Assessing Biological Exposure to Arsenic Species by Two Representative Analytical Methods

Jeong-Wook Seo and Young-Seoub Hong

**Table S1.** Adjusted geometric mean concentrations of As species in 102 abandoned metal mines.

|                              |                | Adjusted GM (95% CI) (µg/g cr) |                 |                 |                 |                    |                    |                               | HG-AAS             |
|------------------------------|----------------|--------------------------------|-----------------|-----------------|-----------------|--------------------|--------------------|-------------------------------|--------------------|
|                              |                | <i>n</i> (%)                   | Inorganic As    |                 |                 | Organic As         |                    | AsIII + AsV<br>+ MMA +<br>DMA |                    |
|                              |                |                                | AsIII           | AsV             | Subtotal        | MMA                | DMA                |                               |                    |
| Total                        | 442<br>(100.0) | 0.10                           | 0.31            | 0.57            | 0.90            | 68.75              | 72.19              | 74.85                         | 55.07              |
|                              |                | (0.08–<br>0.13)                | (0.24–<br>0.39) | (0.45–<br>0.72) | (0.65–<br>1.23) | (61.61–<br>76.73)  | (64.85–<br>80.37)  | (67.50–<br>82.99)             | (48.41–<br>62.64)  |
| Sex                          |                |                                |                 |                 |                 |                    |                    |                               |                    |
| Male                         | 182<br>(41.2)  | 0.13                           | 0.35            | 0.72            | 1.09            | 59.05              | 62.50              | 65.98                         | 44.74              |
|                              |                | (0.10–<br>0.17)                | (0.26–<br>0.47) | (0.55–<br>0.94) | (0.76–<br>1.58) | (51.95–<br>67.13)  | (55.14–<br>70.84)  | (58.48–<br>74.43)             | (38.49–<br>52.01)  |
| Female                       | 260<br>(58.8)  | 0.08                           | 0.27            | 0.46            | 0.74            | 80.05              | 83.40              | 84.91                         | 67.77              |
|                              |                | (0.05–<br>0.11)                | (0.18–<br>0.39) | (0.32–<br>0.64) | (0.46–<br>1.18) | (68.02–<br>94.21)  | (71.12–<br>97.79)  | (72.85–<br>98.98)             | (55.98–<br>82.06)  |
| <i>p</i> -value              |                | 0.008                          | 0.256           | 0.030           | 0.168           | 0.002              | 0.003              | 0.007                         | <0.001             |
| Age (y)                      |                |                                |                 |                 |                 |                    |                    |                               |                    |
| ≤59                          | 77<br>(17.4)   | 0.16                           | 0.48            | 1.06            | 0.80            | 49.77              | 52.68              | 56.48                         | 39.62              |
|                              |                | (0.11–<br>0.24)                | (0.31–<br>0.74) | (0.72–<br>1.58) | (0.47–<br>1.37) | (41.31–<br>59.96)  | (43.91–<br>63.20)  | (47.40–<br>67.31)             | (31.83–<br>49.31)  |
| 60–69                        | 140<br>(31.7)  | 0.10                           | 0.36            | 0.65            | 0.98            | 62.46              | 65.96              | 68.89                         | 47.48              |
|                              |                | (0.08–<br>0.14)                | (0.26–<br>0.50) | (0.48–<br>0.88) | (0.65–<br>1.48) | (54.08–<br>72.14)  | (57.30–<br>75.94)  | (60.15–<br>78.90)             | (40.08–<br>56.23)  |
| 70–79                        | 154<br>(34.8)  | 0.08                           | 0.23            | 0.39            | 0.82            | 76.59              | 80.02              | 82.12                         | 60.84              |
|                              |                | (0.06–<br>0.11)                | (0.16–<br>0.32) | (0.28–<br>0.53) | (0.54–<br>1.25) | (66.10–<br>88.75)  | (69.29–<br>92.42)  | (71.49–<br>94.33)             | (51.17–<br>72.33)  |
| ≥80                          | 71<br>(16.1)   | 0.08                           | 0.22            | 0.40            | 1.01            | 93.84              | 97.69              | 98.23                         | 80.36              |
|                              |                | (0.05–<br>0.12)                | (0.14–<br>0.35) | (0.26–<br>0.61) | (0.56–<br>1.81) | (76.56–<br>115.04) | (80.06–<br>119.20) | (81.10–<br>118.98)            | (63.27–<br>102.07) |
| <i>p</i> -value              |                | 0.018                          | 0.013           | <0.001          | 0.824           | <0.001             | <0.001             | <0.001                        | <0.001             |
| Period of resi-<br>dence (y) |                |                                |                 |                 |                 |                    |                    |                               |                    |
| ≤20                          | 85<br>(19.2)   | 0.09                           | 0.21            | 0.38            | 0.55            | 69.73              | 72.65              | 73.95                         | 61.54              |
|                              |                | (0.06–<br>0.13)                | (0.14–<br>0.32) | (0.26–<br>0.55) | (0.33–<br>0.92) | (58.31–<br>83.39)  | (61.00–<br>86.53)  | (62.50–<br>87.51)             | (49.88–<br>75.93)  |
| 21–40                        | 69<br>(15.6)   | 0.07                           | 0.32            | 0.49            | 0.70            | 74.46              | 77.65              | 79.83                         | 59.22              |
|                              |                | (0.05–<br>0.11)                | (0.20–<br>0.51) | (0.32–<br>0.74) | (0.39–<br>1.25) | (60.89–<br>91.06)  | (63.79–<br>94.53)  | (66.06–<br>96.48)             | (46.76–<br>75.01)  |

|                                                                   |               |                                      |                                       |                                       |                                      |                                          |                                          |                                          |                                          |
|-------------------------------------------------------------------|---------------|--------------------------------------|---------------------------------------|---------------------------------------|--------------------------------------|------------------------------------------|------------------------------------------|------------------------------------------|------------------------------------------|
| 41–60                                                             | 152<br>(34.4) | 0.14<br>(0.11– <sup>a</sup><br>0.20) | 0.30<br>(0.21–<br>0.42)               | 0.72<br>(0.53– <sup>a</sup><br>0.98)  | 1.41<br>(0.93– <sup>a</sup><br>2.14) | 72.69<br>(62.90–<br>84.00)               | 76.94<br>(66.80–<br>88.63)               | 80.19<br>(69.99–<br>91.89)               | 56.62<br>(47.77– <sup>a</sup><br>67.11)  |
| ≥61                                                               | 136<br>(30.8) | 0.11<br>(0.08– <sup>a</sup><br>0.15) | 0.43<br>(0.30–<br>0.61)               | 0.81<br>(0.59– <sup>a</sup><br>1.12)  | 1.20<br>(0.77– <sup>a</sup><br>1.86) | 59.21<br>(50.80–<br>69.00)               | 62.58<br>(53.89–<br>72.69)               | 66.29<br>(57.39–<br>76.56)               | 44.56<br>(37.23– <sup>a</sup><br>53.34)  |
| <i>p</i> -value                                                   |               | 0.013                                | 0.053                                 | 0.004                                 | 0.006                                | 0.120                                    | 0.116                                    | 0.151                                    | 0.049                                    |
| Drinking water                                                    |               |                                      |                                       |                                       |                                      |                                          |                                          |                                          |                                          |
| Ground wa-<br>ter/local drink-<br>ing water                       | 259<br>(58.6) | 0.11<br>(0.09–<br>0.14)              | 0.31<br>(0.23–<br>0.41)               | 0.63<br>(0.49–<br>0.81)               | 0.99<br>(0.71–<br>1.40)              | 65.16<br>(57.90–<br>73.34)               | 68.68<br>(61.19–<br>77.09)               | 71.40<br>(63.88–<br>79.80)               | 53.82<br>(46.84–<br>61.83)               |
| Tap water/puri-<br>fied water                                     | 183<br>(41.4) | 0.09<br>(0.07–<br>0.12)              | 0.30<br>(0.22–<br>0.42)               | 0.52<br>(0.39–<br>0.70)               | 0.81<br>(0.54–<br>1.21)              | 72.54<br>(63.03–<br>83.49)               | 75.89<br>(66.15–<br>87.06)               | 78.47<br>(68.75–<br>89.56)               | 56.35<br>(47.78–<br>66.46)               |
| <i>p</i> -value                                                   |               | 0.119                                | 0.916                                 | 0.207                                 | 0.308                                | 0.129                                    | 0.149                                    | 0.156                                    | 0.580                                    |
| Seafood intake<br>in the last week<br>(missing <i>n</i> =<br>117) |               |                                      |                                       |                                       |                                      |                                          |                                          |                                          |                                          |
| Yes                                                               | 268<br>(82.5) | 0.09<br>(0.07–<br>0.12)              | 0.26<br>(0.20– <sup>a</sup><br>0.33)  | 0.48<br>(0.38– <sup>a</sup><br>0.61)  | 1.05<br>(0.71–<br>1.55)              | 69.31<br>(61.23–<br>78.45)               | 72.83<br>(64.50–<br>82.23)               | 74.36<br>(65.97–<br>83.82)               | 56.86<br>(50.24–<br>64.35)               |
| No                                                                | 57<br>(17.5)  | 0.14<br>(0.09–<br>0.23)              | 0.42<br>(0.27– <sup>a</sup><br>0.64)  | 0.85<br>(0.57– <sup>a</sup><br>1.28)  | 0.79<br>(0.40–<br>1.55)              | 64.99<br>(52.60–<br>80.29)               | 68.53<br>(55.70–<br>84.30)               | 71.04<br>(57.91–<br>87.15)               | 52.49<br>(42.50–<br>64.83)               |
| <i>p</i> -value                                                   |               | 0.085                                | 0.022                                 | 0.005                                 | 0.401                                | 0.542                                    | 0.555                                    | 0.653                                    | 0.448                                    |
| Distance from<br>mine (km)<br>(missing <i>n</i> = 48)             |               |                                      |                                       |                                       |                                      |                                          |                                          |                                          |                                          |
| < 0.5                                                             | 95<br>(24.1)  | 0.12<br>(0.08–<br>0.17)              | 0.52<br>(0.36– <sup>a</sup><br>0.76)  | 0.96<br>(0.68– <sup>a</sup><br>1.36)  | 1.31<br>(0.81–<br>2.12)              | 52.00<br>(44.04– <sup>bc</sup><br>61.39) | 55.65<br>(47.29– <sup>b</sup><br>65.49)  | 59.08<br>(50.50– <sup>c</sup><br>69.11)  | 38.95<br>(32.16– <sup>b</sup><br>47.16)  |
| 0.5–< 1.0                                                         | 95<br>(24.1)  | 0.10<br>(0.07–<br>0.14)              | 0.36<br>(0.24– <sup>ab</sup><br>0.53) | 0.66<br>(0.46– <sup>ab</sup><br>0.95) | 0.86<br>(0.52–<br>1.44)              | 76.36<br>(64.02– <sup>b</sup><br>91.07)  | 79.59<br>(66.97– <sup>b</sup><br>94.60)  | 82.65<br>(69.98– <sup>b</sup><br>97.62)  | 60.51<br>(49.39– <sup>ab</sup><br>74.12) |
| 1.0–< 1.5                                                         | 95<br>(24.1)  | 0.09<br>(0.06–<br>0.14)              | 0.32<br>(0.21– <sup>ab</sup><br>0.49) | 0.56<br>(0.38– <sup>ab</sup><br>0.83) | 0.78<br>(0.46–<br>1.32)              | 76.12<br>(63.32– <sup>b</sup><br>91.51)  | 79.39<br>(66.28– <sup>b</sup><br>95.09)  | 82.62<br>(69.43– <sup>b</sup><br>98.31)  | 62.44<br>(50.51– <sup>ab</sup><br>77.20) |
| 1.5–< 3.0                                                         | 80<br>(20.3)  | 0.08<br>(0.06–<br>0.12)              | 0.21<br>(0.14– <sup>bc</sup><br>0.33) | 0.40<br>(0.27– <sup>b</sup><br>0.58)  | 0.73<br>(0.43–<br>1.24)              | 81.41<br>(67.67– <sup>a</sup><br>97.94)  | 84.76<br>(70.71– <sup>a</sup><br>101.60) | 86.06<br>(72.27– <sup>a</sup><br>102.48) | 71.29<br>(57.61– <sup>a</sup><br>88.21)  |
| ≥3.0                                                              | 29 (7.4)      | 0.09<br>(0.05–<br>0.16)              | 0.11<br>(0.06– <sup>c</sup><br>0.22)  | 0.28<br>(0.15– <sup>b</sup><br>0.51)  | 0.60<br>(0.26–<br>1.38)              | 49.14<br>(36.90– <sup>c</sup><br>65.44)  | 51.59<br>(38.96– <sup>c</sup><br>68.32)  | 51.86<br>(39.57– <sup>d</sup><br>67.98)  | 46.22<br>(33.23– <sup>ab</sup><br>64.29) |
| <i>p</i> -value                                                   |               | 0.587                                | <0.001                                | <0.001                                | 0.287                                | <0.001                                   | <0.001                                   | <0.001                                   | <0.001                                   |
| As (3+) + As (5+)<br>+ MMA + DMA                                  |               |                                      |                                       |                                       |                                      |                                          |                                          |                                          |                                          |
| 1Q (12.60–49.27<br>µg/g cr)                                       | 111<br>(25.1) | 0.08<br>(0.06– <sup>a</sup><br>0.11) | 0.46<br>(0.32– <sup>a</sup><br>0.67)  | 0.74<br>(0.53–<br>1.04)               | 0.74<br>(0.47–<br>1.17)              | 26.72<br>(25.00– <sup>c</sup><br>28.56)  | 28.67<br>(26.88– <sup>c</sup><br>30.58)  | 30.96<br>(29.14– <sup>c</sup><br>32.90)  | 22.20<br>(19.65– <sup>c</sup><br>25.08)  |

|                                |               |                         |                         |                         |                         |                               |                               |                               |                               |
|--------------------------------|---------------|-------------------------|-------------------------|-------------------------|-------------------------|-------------------------------|-------------------------------|-------------------------------|-------------------------------|
| 2Q (49.34–82.17<br>μg/g cr)    | 111<br>(25.1) | 0.10<br>(0.07–<br>0.14) | 0.30<br>(0.21–<br>0.45) | 0.57<br>(0.40–<br>0.81) | 1.10<br>(0.68–<br>1.76) | 59.90<br>(55.91–<br>64.19)    | 63.04<br>(58.96–<br>67.40)    | 64.39<br>(60.45–<br>68.59)    | 45.98<br>(40.50–<br>52.19)    |
| 3Q (80.33–<br>120.28 μg/g cr)  | 110<br>(24.9) | 0.09<br>(0.07–<br>0.13) | 0.23<br>(0.16–<br>0.34) | 0.43<br>(0.31–<br>0.60) | 1.06<br>(0.67–<br>1.67) | 92.35<br>(86.38–<br>98.73)    | 95.90<br>(89.89–<br>102.32)   | 98.16<br>(92.34–<br>104.34)   | 74.66<br>(66.04–<br>84.41)    |
| 4Q (120.85–<br>633.97 μg/g cr) | 110<br>(24.9) | 0.14<br>(0.10–<br>0.20) | 0.25<br>(0.17–<br>0.36) | 0.57<br>(0.40–<br>0.81) | 0.79<br>(0.49–<br>1.26) | 170.48<br>(159.15–<br>182.62) | 176.29<br>(164.92–<br>188.44) | 179.01<br>(168.10–<br>190.62) | 134.45<br>(118.50–<br>152.55) |
| <i>p</i> -value                |               | 0.050                   | 0.014                   | 0.075                   | 0.309                   | <0.001                        | <0.001                        | <0.001                        | <0.001                        |

abc: Grouping by Bonferroni post-hoc. Estimates with the same letter are not significantly different. Adjusted: least square means adjusted by sex, age, period of residence (missing  $n = 1$ ), drinking water, smoking status, and drinking status.

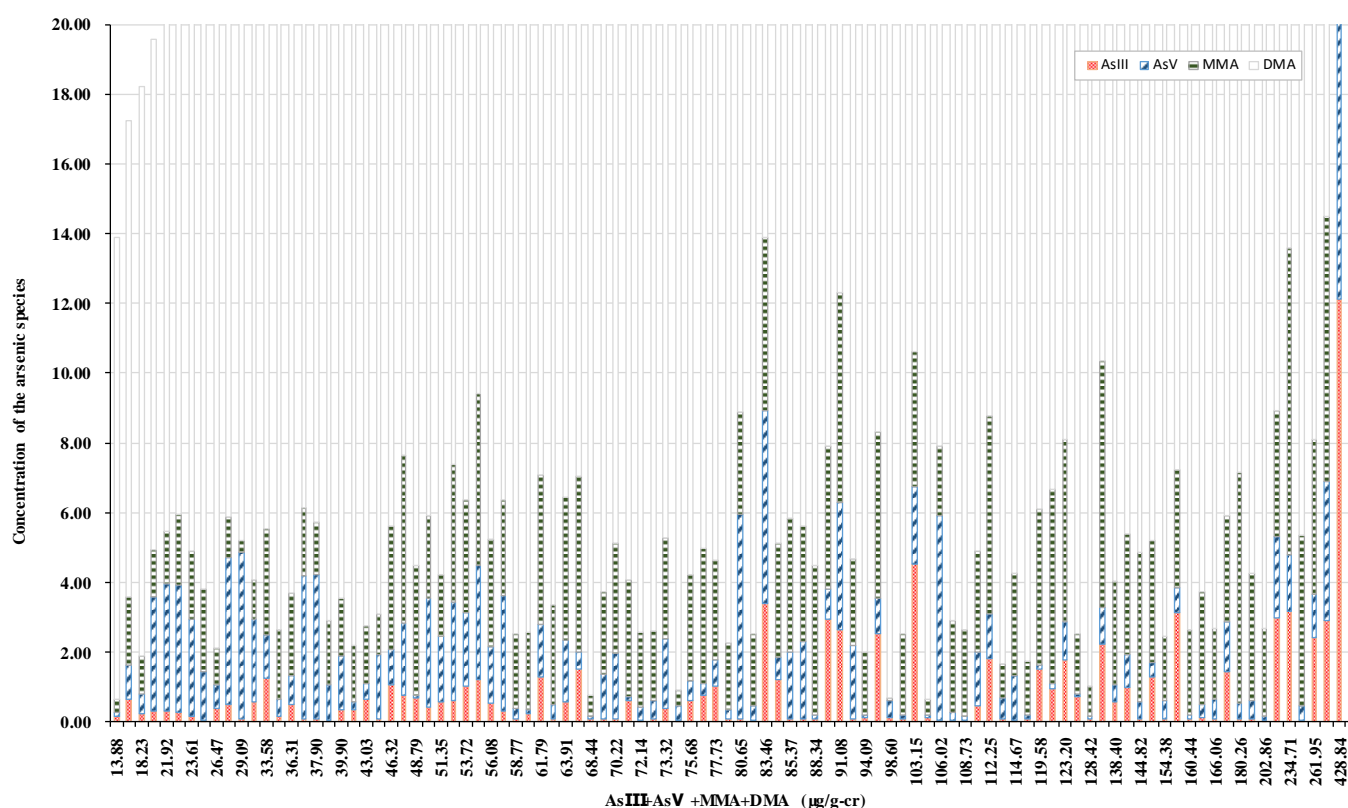

Figure S1. Distribution of As species concentrations by AsIII + AsV + MMA + DMA percentile.

Table S2. Correlation coefficient of As species concentration and proportion.

| Group | As Species | HPLC-ICP-MS   |           |           |                  |                        | Proportion of As Species<br>Relative to the Sum of<br>Concentrations of 4 As<br>Species |                        |                  |           |                  |                  |                  |                                             |
|-------|------------|---------------|-----------|-----------|------------------|------------------------|-----------------------------------------------------------------------------------------|------------------------|------------------|-----------|------------------|------------------|------------------|---------------------------------------------|
|       |            |               |           |           |                  |                        | HG<br>-<br>AA<br>S                                                                      | Inorganic As           |                  |           | Organic As       |                  |                  | Su<br>m<br>of<br>3<br>As<br>Sp<br>eci<br>es |
|       |            |               |           |           |                  |                        |                                                                                         | Sum of 4<br>As Species | AsI<br>II        | As<br>V   | Su<br>bto<br>tal | MMDM<br>A A      | Su<br>bto<br>tal |                                             |
|       |            |               |           |           |                  |                        |                                                                                         |                        |                  |           |                  |                  |                  |                                             |
|       |            |               |           |           |                  |                        |                                                                                         |                        |                  |           |                  |                  |                  |                                             |
| AsIII | As<br>V    | Sub-<br>total | MMDM<br>A | MMDM<br>A | Su<br>bto<br>tal | Sum of 4<br>As Species | AsI<br>II                                                                               | As<br>V                | Su<br>bto<br>tal | MMDM<br>A | MMDM<br>A        | Su<br>bto<br>tal |                  |                                             |

|                                      |                                                                                                   |                          |     |           |       |           |           |           |       |           |                         |                         |                         |                         |                         |                         |                |
|--------------------------------------|---------------------------------------------------------------------------------------------------|--------------------------|-----|-----------|-------|-----------|-----------|-----------|-------|-----------|-------------------------|-------------------------|-------------------------|-------------------------|-------------------------|-------------------------|----------------|
| 103<br>mines<br>( <i>n</i> =<br>457) | HPLC-ICP-MS                                                                                       | AsIII                    | 1   | 0.5<br>49 | 0.919 | 0.82<br>2 | 0.31<br>3 | 0.3<br>84 | 0.479 | 0.4<br>58 | <b>0.7</b><br><b>63</b> | 0.0<br>49               | 0.3<br>50               | 0.32<br>8               | -<br>0.41<br>0          | -<br>0.3<br>50          | 0.4<br>10      |
|                                      |                                                                                                   | Inorganic<br>As          | AsV | 1         | 0.835 | 0.68<br>1 | 0.20<br>8 | 0.2<br>69 | 0.360 | 0.2<br>34 | 0.3<br>28               | <b>0.5</b><br><b>24</b> | 0.5<br>99               | 0.29<br>3               | -<br>0.57<br>9          | -<br>0.5<br>99          | 0.5<br>79      |
|                                      |                                                                                                   | Subto-<br>tal            |     | 1         |       | 0.86<br>4 | 0.30<br>4 | 0.3<br>81 | 0.485 | 0.4<br>12 | 0.6<br>58               | 0.2<br>80               | <b>0.5</b><br><b>14</b> | 0.35<br>5               | -<br>0.54<br>4          | -<br>0.5<br>14          | 0.5<br>44      |
|                                      |                                                                                                   | MMA                      |     |           |       | 1         | 0.35<br>8 | 0.4<br>46 | 0.530 | 0.4<br>36 | 0.5<br>27               | 0.0<br>62               | 0.2<br>67               | <b>0.54</b><br><b>5</b> | -<br>0.44<br>7          | -<br>0.2<br>67          | 0.4<br>47      |
|                                      |                                                                                                   | Organic As DMA           |     |           |       | 1         | 0.9<br>95 |           | 0.979 | 0.8<br>91 | 0.0<br>79               | -<br>0.2<br>35          | -<br>0.1<br>79          | -<br>0.18<br>8          | <b>0.21</b><br><b>9</b> | 0.1<br>79               | -<br>0.2<br>19 |
|                                      |                                                                                                   | Subto-<br>tal            |     |           |       | 1         |           |           | 0.993 | 0.8<br>99 | 0.1<br>30               | -<br>0.2<br>19          | -<br>0.1<br>44          | -<br>0.12<br>4          | 0.16<br>4               | <b>0.1</b><br><b>44</b> | -<br>0.1<br>64 |
|                                      |                                                                                                   | Sum of 4 As spe-<br>cies |     |           |       |           |           |           | 1     | 0.9<br>02 | 0.2<br>05               | -<br>0.1<br>72          | -<br>0.0<br>71          | -<br>0.07<br>3          | 0.08<br>6               | 0.0<br>71               | -<br>0.0<br>86 |
|                                      | Proportion of<br>As species rela-<br>tive to the sum<br>of concentra-<br>tions of 4 As<br>species | HG-AAS                   |     |           |       |           |           |           |       | 1         | 0.2<br>07               | -<br>0.2<br>30          | -<br>0.1<br>22          | -<br>0.12<br>0          | 0.14<br>5               | 0.1<br>22               | -<br>0.1<br>45 |
|                                      |                                                                                                   | AsIII                    |     |           |       |           |           |           |       | 1         | 0.0<br>57               | 0.4<br>53               | 0.43<br>7               | -<br>0.53<br>6          | -<br>0.4<br>53          | 0.5<br>36               |                |
|                                      |                                                                                                   | Inorganic<br>As          | AsV |           |       |           |           |           |       | 1         | 0.9<br>16               | 0.19<br>9               | -<br>0.77<br>2          | -<br>0.9<br>16          | 0.7<br>72               |                         |                |
|                                      |                                                                                                   | Subto-<br>tal            |     |           |       |           |           |           |       | 1         | 0.35<br>3               | -<br>0.90<br>5          | -<br>1.0<br>00          | 0.9<br>05               |                         |                         |                |
| MMA                                  |                                                                                                   |                          |     |           |       |           |           |           |       |           | 1                       | 0.71<br>8               | 0.3<br>53               | 0.7<br>18               |                         |                         |                |
| Organic As DMA                       |                                                                                                   |                          |     |           |       |           |           |           |       |           |                         | 1                       | 0.9<br>05               | 1.0<br>00               |                         |                         |                |
| Subto-<br>tal                        |                                                                                                   |                          |     |           |       |           |           |           |       |           |                         |                         | 1                       | 0.9<br>05               |                         |                         |                |
| Sum of 3 AS spe-<br>cies             |                                                                                                   |                          |     |           |       |           |           |           |       |           |                         |                         |                         |                         |                         | 1                       |                |
